# Supplementary material for: Effect of tidal volume on tolerance to hemorrhage and resuscitation requirements: an experimental study in ventilated piglets
Source: Research Square preprint supplement (doi:10.21203/rs.3.rs-8590998/v1), 2026-02-03
Supplement: Supplementary file 1 [file f27ab9bab65bdd728df5ab64.docx]

# ARRIVE study plan

Please fill in all sections of the ARRIVE study plan.

| Study details | | | |
| --- | --- | --- | --- |
| Study title: | Effect of tidal volume on tolerance to hemorrhage and resuscitation requirements: an experimental study in ventilated piglets | Grant code: | Enter |
| Start date: | 24/03/2025 | End date: | 07/04/2025 |
| Project licence or permit number: | 9341-2021012709128801 | Project lead: | Fabien Coisy, Fabien.coisy@gmail.com |
| Protocol numbers: | 9341-2021012709128801 | Expected severity: | Moderate (controlled hemorrhagic shock with resuscitation and euthanasia) |
| Primary responsible: | Coisy Fabien | Contact details: | Fabien.coisy@gmail.com |
| Secondary contact: | Xavier Bobbia | Contact details: | Xavier.bobbia@gmail.com |

| [Experimental animals](https://arriveguidelines.org/arrive-guidelines/experimental-animals) 🔗 | | | | | | |
| --- | --- | --- | --- | --- | --- | --- |
| Species | Strain/Genotype | Sex | Age | Weight | Source | Number |
| Pig | Domestic strain | N/A | 2-3 months | 25-30 kg | GAEC Maruéjouls, Le Bès, 12800 Sauveterre-de-Rouergue | 16 total (8 per group) |
|  | | | | | Total number | 16 |

| [Experimental procedures](https://arriveguidelines.org/arrive-guidelines/experimental-procedures) 🔗  What is done and how is it done, when and how often. | |
| --- | --- |
| Procedures: | Animals were randomly allocated to a mechanical ventilation strategy defined by tidal volume (6 or 8 mL·kg⁻¹). After induction of anesthesia and establishment of invasive monitoring, hemorrhagic shock was induced by controlled blood withdrawal at a rate of 2 mL·kg⁻¹·min⁻¹ until a target mean arterial pressure (MAP) of 40 mmHg was reached.MAP was then maintained at 40 ± 4 mmHg for 30 minutes by additional blood withdrawal or autologous whole blood transfusion as required. This shock phase was followed by a resuscitation phase using stepwise autologous whole blood transfusion according to protocol-defined MAP targets. Hemodynamic and biological parameters were recorded at predefined time points throughout the experiment (T0, T1, T2, T3, and T4). Animals were euthanized at the end of the protocol. |
| Surgical procedures: | Ultrasound-guided catheterization of femoral artery and vein, jugular central venous line placement. |
| Anaesthesia: | General anesthesia with propofol (4 mg/kg bolus and continuous infusion at 8 mg/kg/h), sufentanil (10 µg), and midazolam (1 mg/kg). |
| Analgesia: | Sufentanil infusion during all invasive procedures. |
| Locations: | Experimental surgical suite at Nîmes University Hospital Research Unit |
| Acclimatisation period: | One week in enriched housing conditions with group socialization and toys. |

| [Animal care and monitoring](https://arriveguidelines.org/arrive-guidelines/animal-care-and-monitoring) 🔗 | | | |
| --- | --- | --- | --- |
| Adverse events: | Hemodynamic instability, unforeseen procedural complications, or catheter-related issues. | | |
| Humane endpoints: | MAP persistently below 35 mmHg despite interventions. | | |
| Welfare monitoring: | Heart rate, respiratory rate, oxygen saturation, and blood gas levels monitored every 15 minutes. | Attached clinical assessment form: | Yes |
| Changes in [housing and husbandry](https://arriveguidelines.org/arrive-guidelines/housing-and-husbandry) 🔗: | No deviations from standard housing practices. Enrichment includes bedding and interactive objects. | | |
| Restrictions in veterinary care: | N/A | | |

| Risks | |
| --- | --- |
| Emergency procedures: | N/A |
| Potential risk to personnel: | Minimal; universal precautions for handling animal blood and anticoagulant solutions. |

| Personnel involved in the experiment | | |
| --- | --- | --- |
| Fabien Coisy | Experimental protocol execution, data collection | Trained and competent |
| Xavier Bobbia | Anesthesia and hemodynamic monitoring | Trained and competent |
| Marylene Bacle | Anesthesia and supervision | Trained and competent |

| [Study design](https://arriveguidelines.org/arrive-guidelines/study-design) 🔗 and [sample size](https://arriveguidelines.org/arrive-guidelines/sample-size) 🔗 | | | | | |
| --- | --- | --- | --- | --- | --- |
| Experimental groups: | Animals were assigned to experimental groups according to the tidal volume used during mechanical ventilation: low tidal volume (6 mL·kg⁻¹) or medium tidal volume (8 mL·kg⁻¹). The primary comparison focused on the volume of blood withdrawal required to induce hypotension and the transfusion volume required during the resuscitation phase following controlled hemorrhagic shock. Data from a high tidal volume group (10 mL·kg⁻¹) were derived from a previous experimental cohort using the same hemorrhagic shock model. | | | | |
| [Experimental unit](https://arriveguidelines.org/arrive-guidelines/study-design/1b)🔗: | Individual piglet | Sample size per group: | | 8 per group | |
| Justification for sample size: | Sample size was based on feasibility and prior experimental studies using similar hemorrhagic shock models. | | | | |
| [EDA](https://eda.nc3rs.org.uk/)🔗 read only diagram: | Link to EDA read only diagram | | Access code: | | Enter |

| [Inclusion and exclusion criteria](https://arriveguidelines.org/arrive-guidelines/inclusion-and-exclusion-criteria) 🔗 | |
| --- | --- |
| Inclusion criteria: | Healthy piglets aged 2-3 months, weight 25-30 kg. |
| Exclusion criteria: | Abnormal hemodynamic parameters or pre-existing health conditions. |
| Expected attrition: | 1 animal (6%) due to potential catheter-related issues or unforeseen complications. |

| [Randomisation](https://arriveguidelines.org/arrive-guidelines/randomisation) 🔗 and [blinding/masking](https://arriveguidelines.org/arrive-guidelines/blinding) 🔗 | |
| --- | --- |
| Method of allocation to group: | Allocation to ventilation groups was performed using a systematic alternating assignment to ensure balanced group sizes. |
| Strategy to minimise confounders: | Alternating allocation to reduce bias from timing or handling. |
| Blinding strategy: | Blinding was not feasible due to the nature of the experimental intervention (mechanical ventilation settings). Outcome assessment was based on objective physiological measurements. |

| [Outcome measures](https://arriveguidelines.org/arrive-guidelines/outcome-measures) 🔗 and [statistical methods](https://arriveguidelines.org/arrive-guidelines/statistical-methods/) 🔗 | |
| --- | --- |
| Outcome measures: | Volume of blood withdrawal required to reach a target MAP of 40 mmHg. |
| Primary outcome measure: | Volume of blood withdrawn to obtain MAP = 40 mmHg |
| Analysis plans: | Statistical analyses were performed using R software (version 4.4.0). Quantitative variables were described using medians and interquartile ranges (1st and 3rd quartiles) due to non-normal distribution, assessed visually and by normality tests. Comparisons between groups (LV, MV and HV groups) were performed using the Wilcoxon test for continuous variables. Median differences were calculated for depletion and resuscitation volumes with 95% confidence intervals (95% CI) using bootstrap (n=1000).Given the small experimental sample, the exploratory nature of the study, and predefined targeted comparisons, pairwise comparisons were performed without correction for multiple testing, in line with accepted preclinical research practices [14,15]. Results should nevertheless be interpreted with caution. Additional exploratory descriptive analyses were conducted to explore dynamic differences between the LV and MV groups. These analyses focused on changes in ventilatory (respiratory rate, FiO₂, EtCO₂, SpO₂), hemodynamic (depleted volume, resuscitation volume), and metabolic parameters over time. The significance threshold was set at p < 0.05 for all tests. |

| Sign off | |  |  |
| --- | --- | --- | --- |
| Primary responsible: | Fabien Coisy | 06/01/2026 | I confirm I am aware of my responsibilities as the primary responsible (e.g. conditions of the personal licence) and my training and competency record is up to date. |
| Project lead: | Fabien Coisy | 06/01/2026 | I confirm I am aware of my responsibilities as a project lead/licence holder and this work is in line with the project. |
| Internal sign off: | Name | Date | Role, e.g. NACWO |
